# Supplementary material
Source: PubMed Central journal article supplement (PMC4434724)
Supplement: pnas.1504315112.sapp.pdf [file pnas.1504315112.sapp.pdf]

# Supplementary Material

## Energy and Material Flows of Megacities

Chris Kennedy\*<sup>1</sup>  
Iain Stewart<sup>1</sup>  
Angelo Facchini<sup>2</sup>  
Igor Cersosimo<sup>2</sup>  
Renata Mele<sup>2</sup>  
Bin Chen<sup>3</sup>  
Mariko Uda<sup>1</sup>  
Arun Kansal<sup>4</sup>  
Anthony Chiu<sup>5</sup>  
Kwi-gon Kim<sup>6</sup>  
Carolina Dubeux<sup>7</sup>  
Emilio Lebre La Rovere<sup>7</sup>  
Bruno Cunha<sup>7</sup>  
Stephanie Pincetl<sup>8</sup>  
James Keirstead<sup>9</sup>  
Sabine Barles<sup>10</sup>  
Semerdanta Pusaka<sup>11</sup>  
Juniati Gunawan<sup>11</sup>  
Michael Adegbile<sup>12</sup>  
Mehrdad Nazariha<sup>13</sup>  
Shamsul Hoque<sup>14</sup>  
Peter Marcotullio<sup>15</sup>  
Florencia Gonzalezo<sup>16</sup>  
Tarek Genena<sup>17</sup>  
Nadine Ibrahim<sup>1</sup>  
Rizwan Farooqui<sup>18</sup>  
Gemma Cervantes<sup>19</sup>  
Ahmet Duran Sahin<sup>20</sup>

\* corresponding author

1: Department of Civil Engineering, University of Toronto, 35 St. George Street,  
Toronto, Ontario. CANADA. M4J 3K1. Tel: +1 416 978 5978

2: Enel Foundation, 00198, Viale Regina Margherita n. 137, Rome, Italy

3: School of Environment, Beijing Normal University, China, 北京市海淀区新街口外  
大街19号 邮政编码: 100875

4: Department of Energy and Environment, TERI University, 10 Institutional Area,  
Vasant Kunj, New Delhi, DL 110070, India

5: Department of Industrial Engineering, De La Salle University, 2401 Taft Ave, Malate,  
Manila, 1004 Metro Manila, Philippines

- 46 6: Department of Landscape and Ecological Planning, Seoul National University, 1  
47 Gwanak-ro, Gwanak-gu, Seoul, South Korea
- 48 7: COPPE, Federal University of Rio de Janeiro, Av. Pedro Calmon, 550 - Cidade  
49 Universitária, Rio de Janeiro - RJ, 21941-901, Brazil
- 50 8: UCLA Institute of the Environment and Sustainability, La Kretz Hall, Suite 300, Los  
51 Angeles, CA 90095-1496. USA
- 52 9: Dept. of Civil and Environmental Engineering, Laing O'Rourke Centre for Systems  
53 Engineering and Innovation, 407 Skempton Building, Imperial College, South  
54 Kensington, London, SW7 2AZ. UK
- 55 10: Institut de géographie, Université Paris 1 Panthéon Sorbonne 191 rue saint-Jacques  
56 75005 Paris, France
- 57 11: Department of Accounting, Trisakti University, Jl. Kyai Tapa No.1, Grogol, Jakarta  
58 Barat, DKI Jakarta 11440, Indonesia
- 59 12: Department of Architecture, University of Lagos, Dan Fodio Blvd, Lagos 23401,  
60 Nigeria
- 61 13: Department of Environmental Engineering, College of Engineering, University of  
62 Tehran, Enghelab Ave. Tehran, Iran. P.O.Box: 11365-4563
- 63 14: Department of Civil Engineering, Bangladesh University of Engineering &  
64 Technology, Dhaka-1000, Bangladesh
- 65 15: Department of Geography, 1003E Hunter North, Hunter College, 695 Park Ave., New  
66 York, NY 10065. USA
- 67 16: Gerenta Operativa de Cambio Climático y Energía, Dirección General de Estrategias  
68 Ambientales, Agencia de Protección Ambiental, Gobierno de la Ciudad de Buenos Aires,  
69 Argentina
- 70 17: EcoConServ Environmental Solutions, 12 El-Saleh Ayoub St., Zamalek, Cairo,  
71 Egypt 11211
- 72 18: Department of Civil Engineering, Faculty of Civil Engineering and Architecture,  
73 NED University of Engineering & Technology, Karachi 75270, Pakistan
- 74 19: Department of Civil Engineering, Universidad de Guanajuato, Av. Juárez 77. Col.  
75 Centro. CP 36000. Guanajuato, México
- 76 20: İstanbul Technical University, Uçak ve Uzay Bilimleri Fakültesi,  
77 Maslak, 34469, İstanbul, Turkey

78  
79

80

81 **1. Extended Analysis**

82

83 **Figure S1. The number of megacities at the start of each decade since 1960, with**  
 84 **authors' projection to 2020. (Figure 1 from ref. 1; data source:**  
 85 **[www.citypopulation.de/world/Agglomerations.html](http://www.citypopulation.de/world/Agglomerations.html))**  
 86

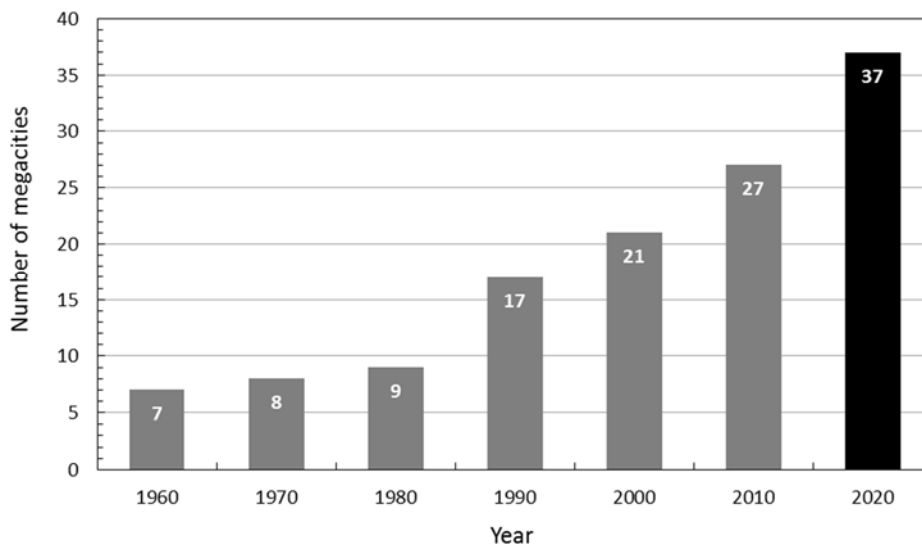

87

88

89

90 **Figure S2. Surveyed megacity population compared with Brinkhoff 2010 values (2).**

91

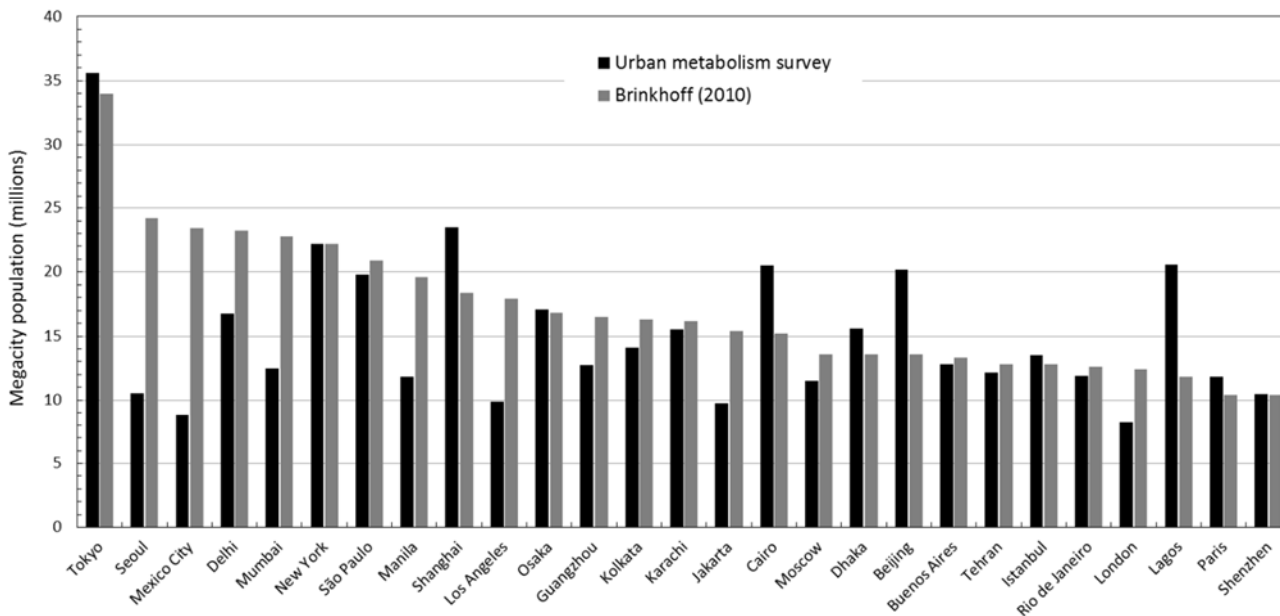

92

93

94 **Figure S3. Ground transportation energy use in relation to urbanized area per**  
 95 **capita.**  
 96

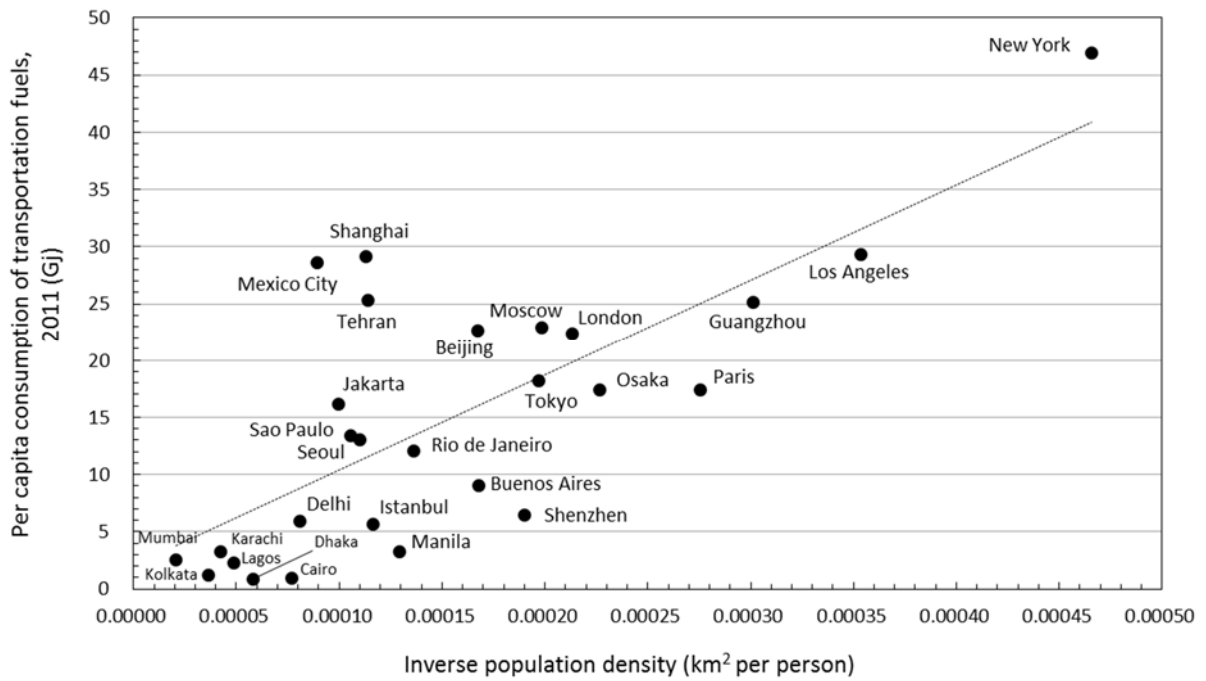

97  
 98  
 99 **Figure S4. Heating and industrial fuel consumption in relation to heating-degree-**  
 100 **days.**  
 101

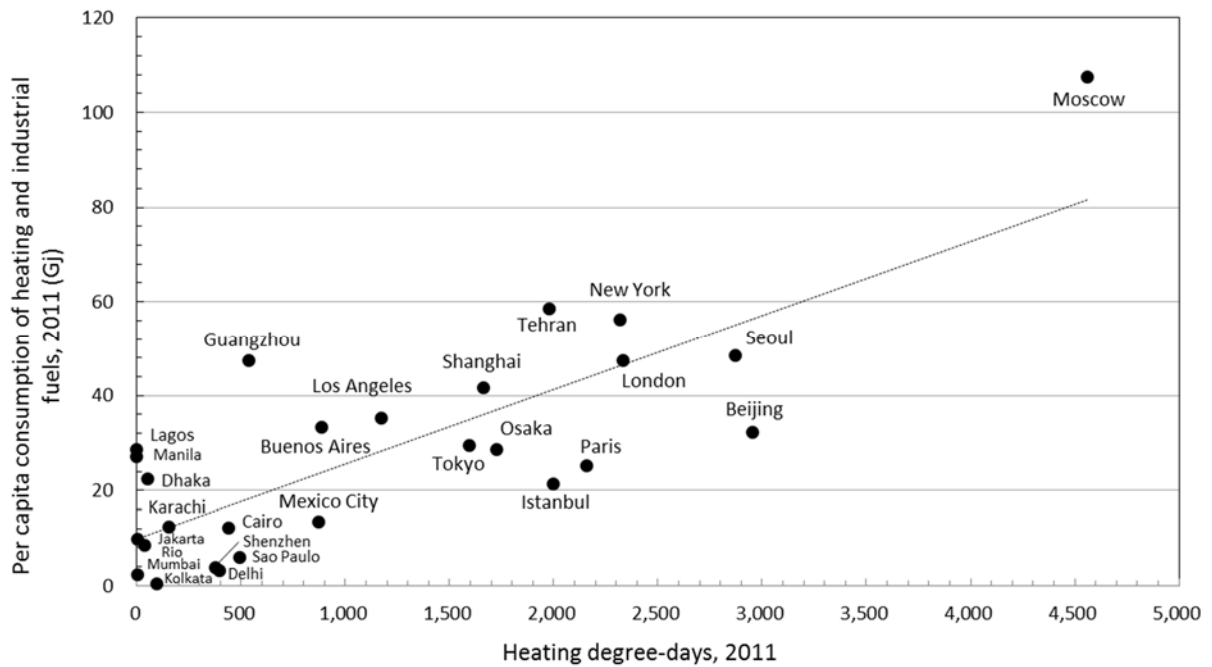

102  
 103

104  
 105  
 106

**Figure S5. Electricity use (including line losses) in relation to urban area per person.**

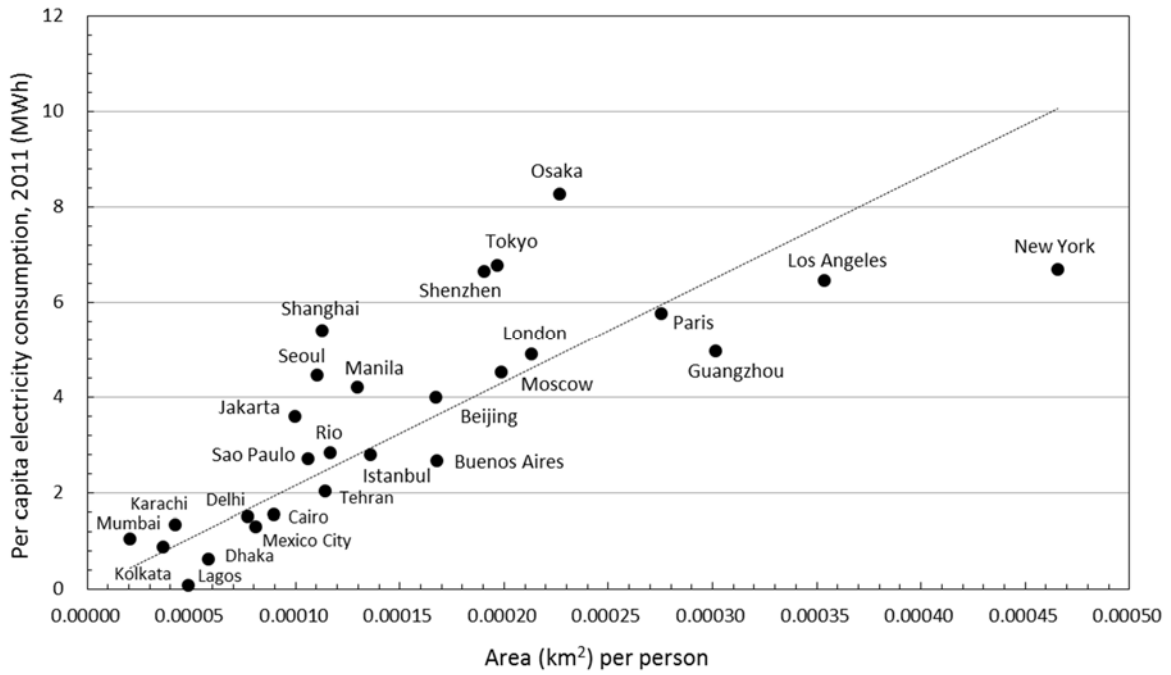

107  
 108  
 109  
 110

**Figure S6. Waste disposal in relation to megacity GDP.**

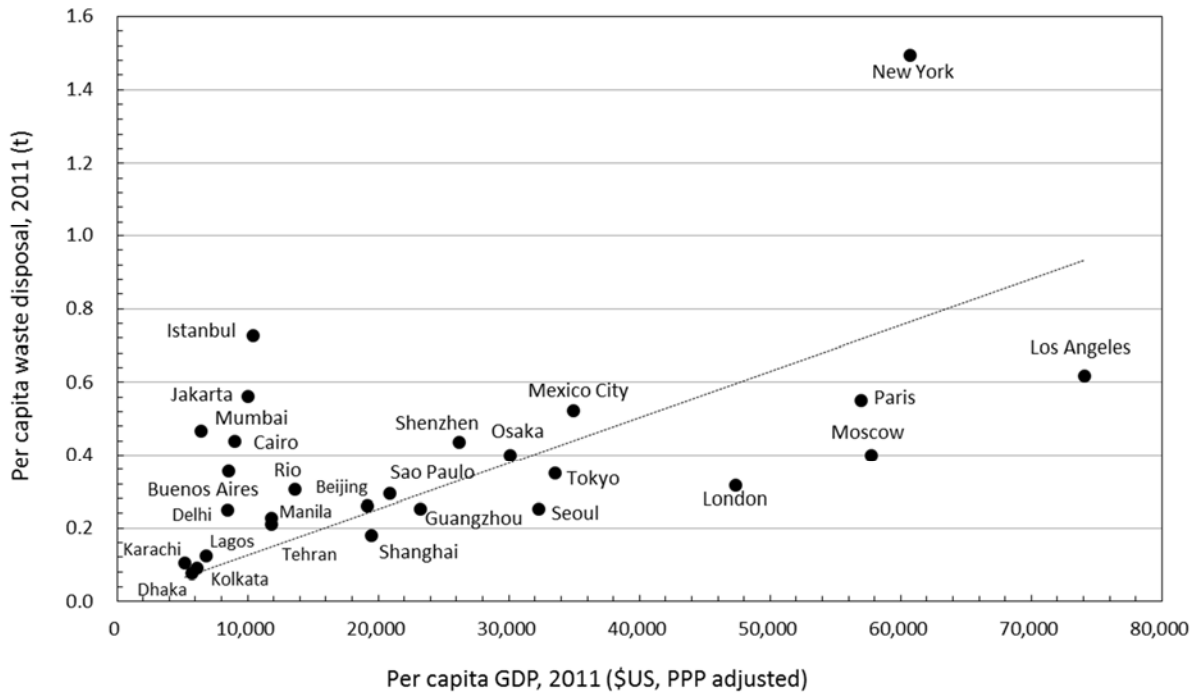

111  
 112  
 113

114  
115

**Figure S7. Electricity use in relation to PPP adjusted megacity GDP.**

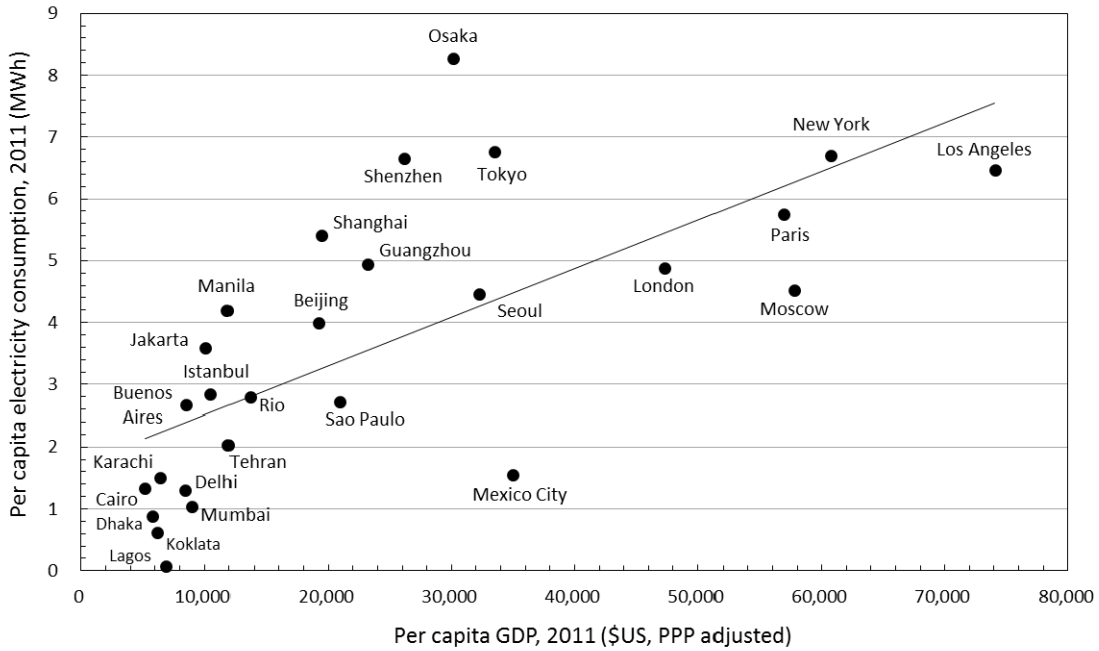

116  
117  
118  
119  
120

**Figure S8. Steel consumption in relation to 10-year population growth.**

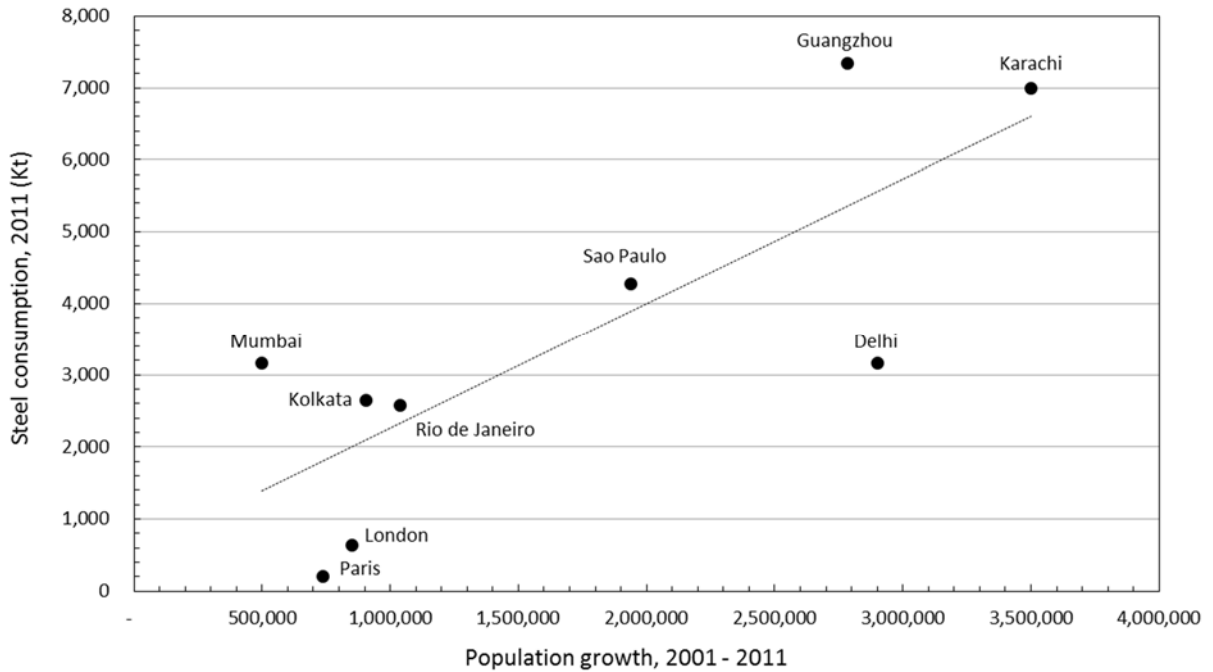

121  
122  
123

124  
125  
126  
127

**Figure S9. Residential electricity use in the local boroughs of London is weakly correlated with median household income ( $t= 3.28$ ;  $P = 0.00267$ ;  $R^2=0.27$ ).**

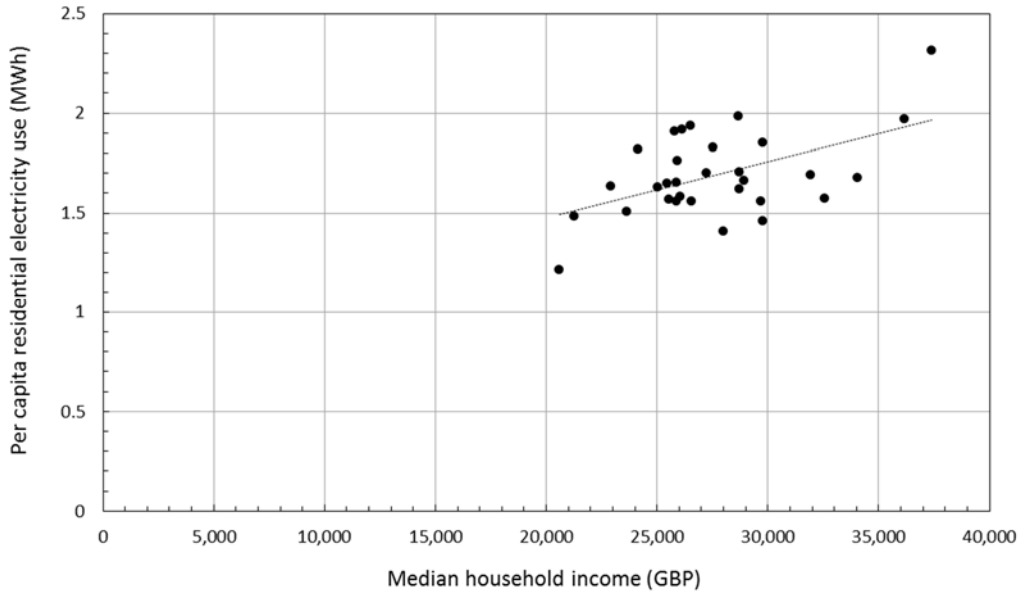

128  
129  
130  
131

**Figure S10. City GDP in relation to urban area per person.**

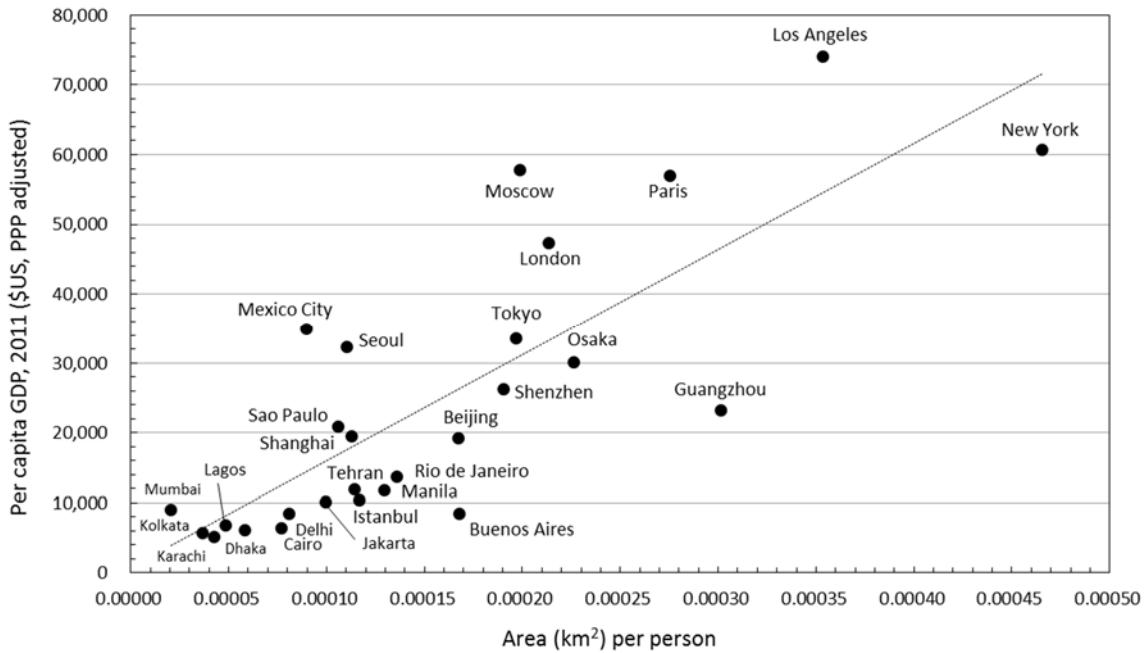

132  
133  
134  
135  
136

137 **Figure S11. Residential land area per capita has no correlation with median**  
 138 **household income for London boroughs.**  
 139

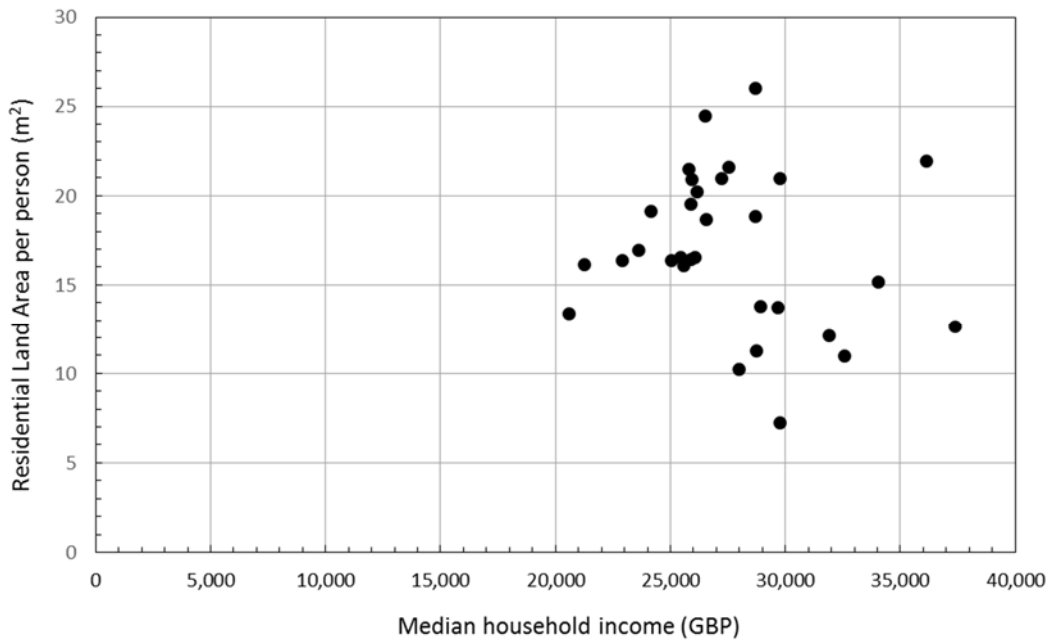

140  
 141  
 142 **Figure S12. Residential gross floor area per capita correlates with urbanized area**  
 143 **per capita.**

144  
 145

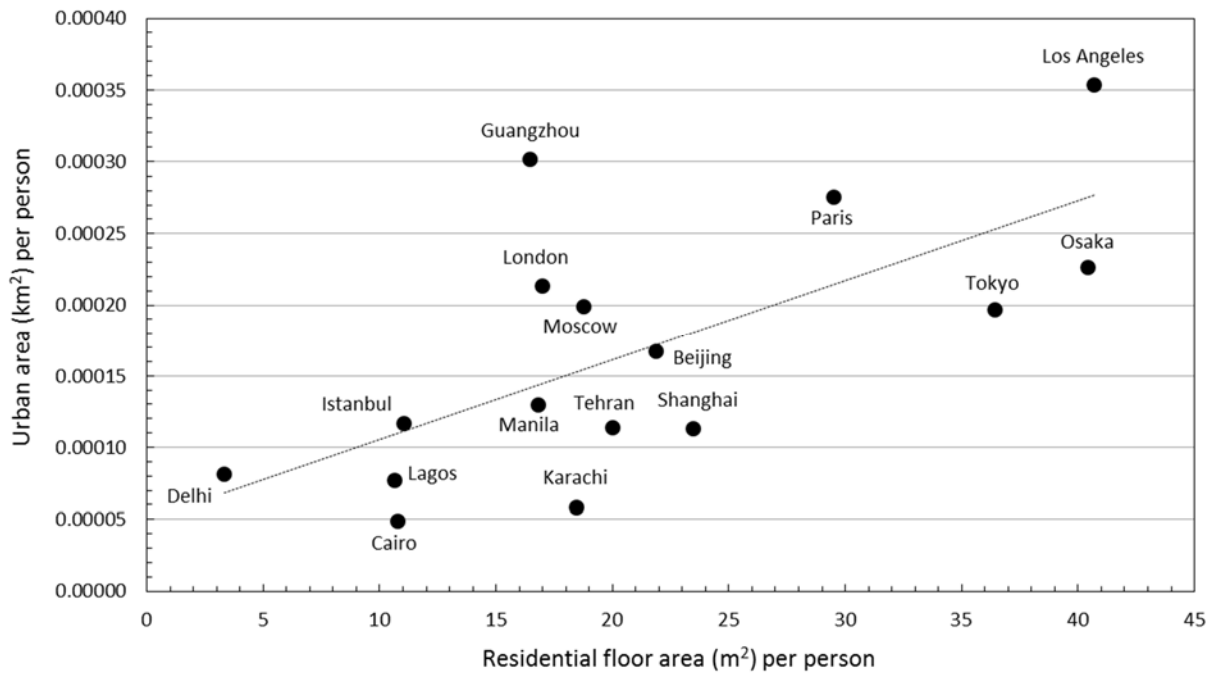

146  
 147  
 148



149  
 150  
 151  
 152

**Figure S13. Total building gross floor area per capita correlates with urbanized area per capita.**

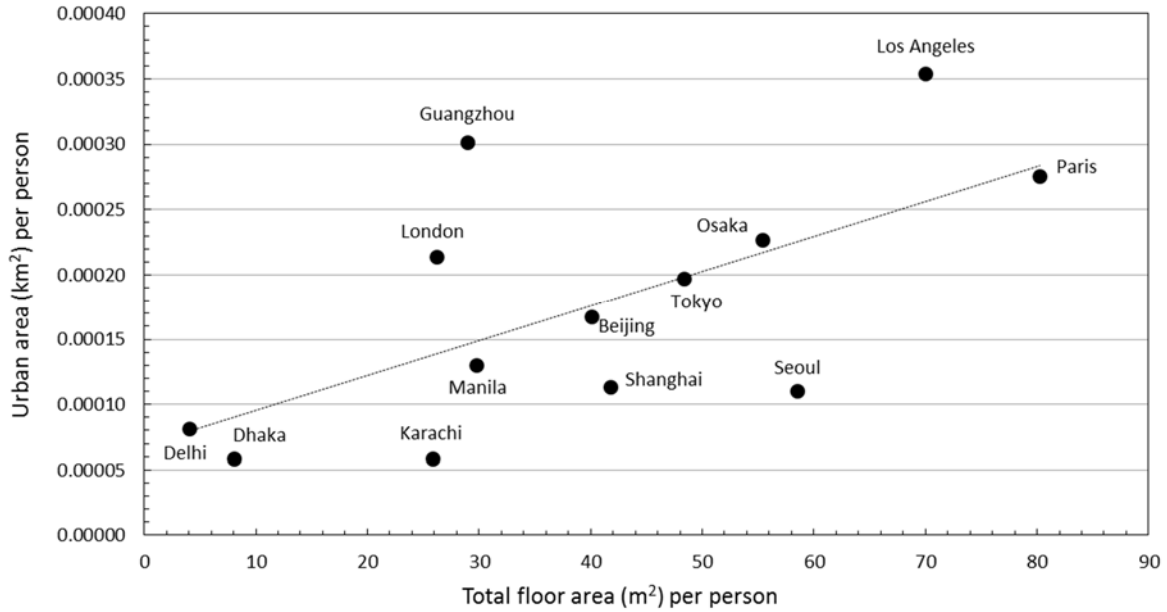

153  
 154  
 155  
 156  
 157  
 158

**Figure S14. Access to the electricity grid in megacities and per capita electricity consumption (percentage of population without grid access in Lagos is unknown).**

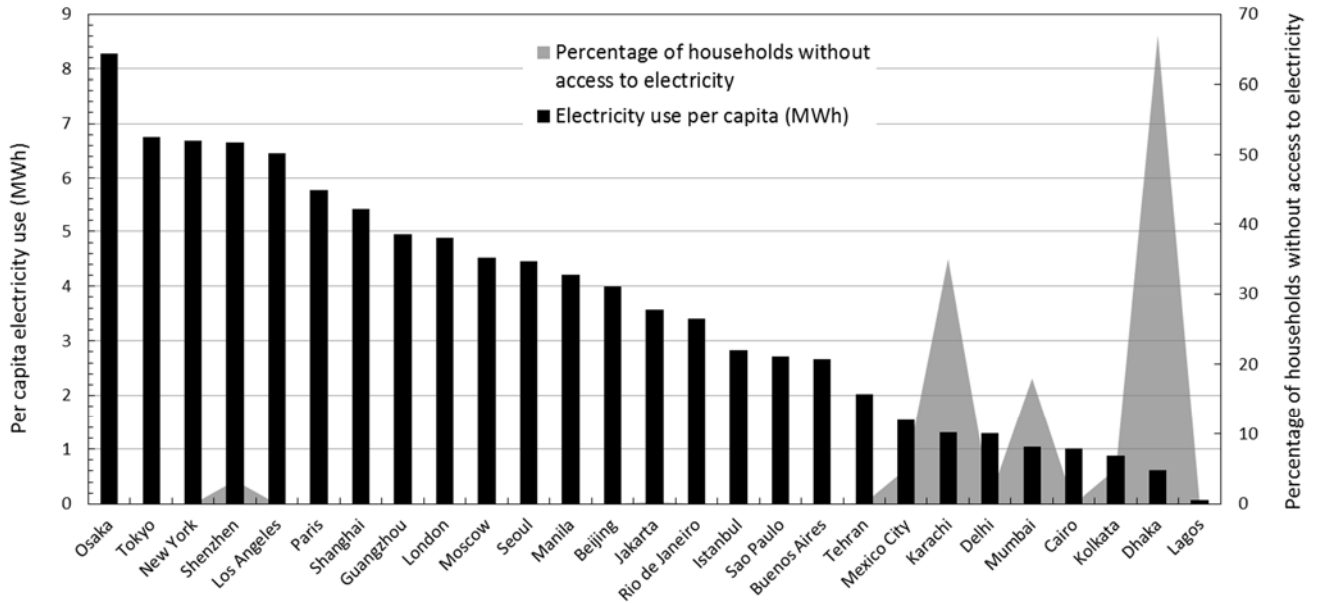

159  
 160

161  
 162  
 163  
 164

**Figure S15. Population growth rates for megacity study areas, 2001 to 2011.**

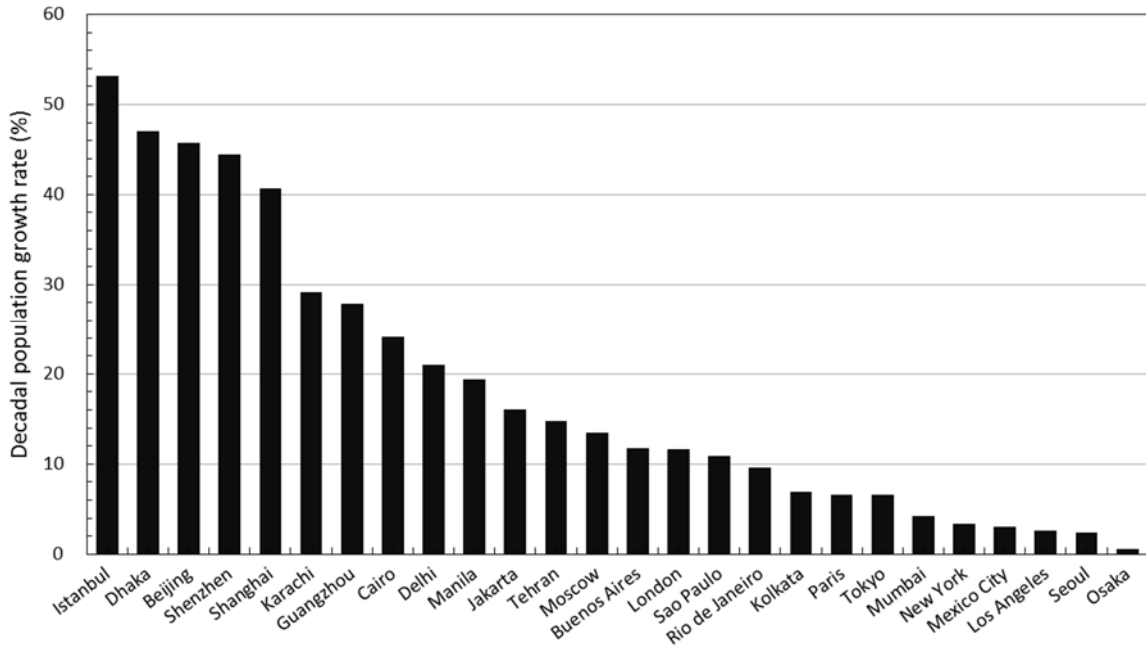

165  
 166  
 167  
 168  
 169

**Figure S16. Growth rates for water consumption from 2001 to 2011.**

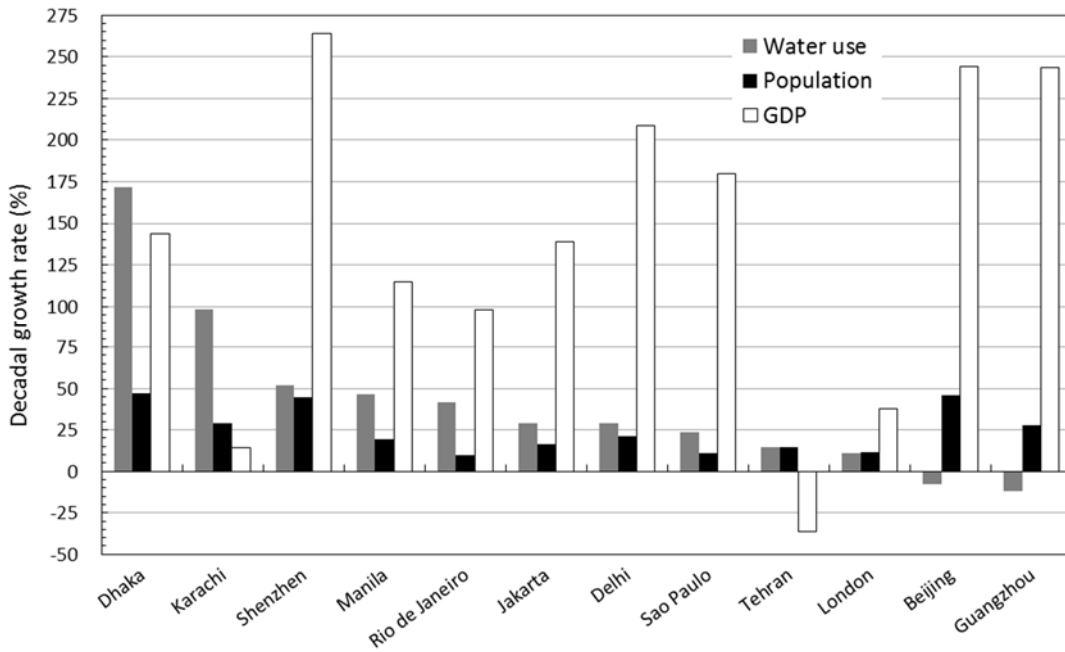

170  
 171  
 172

173  
174

**Figure S17. Growth rates for waste disposal from 2001 to 2011**

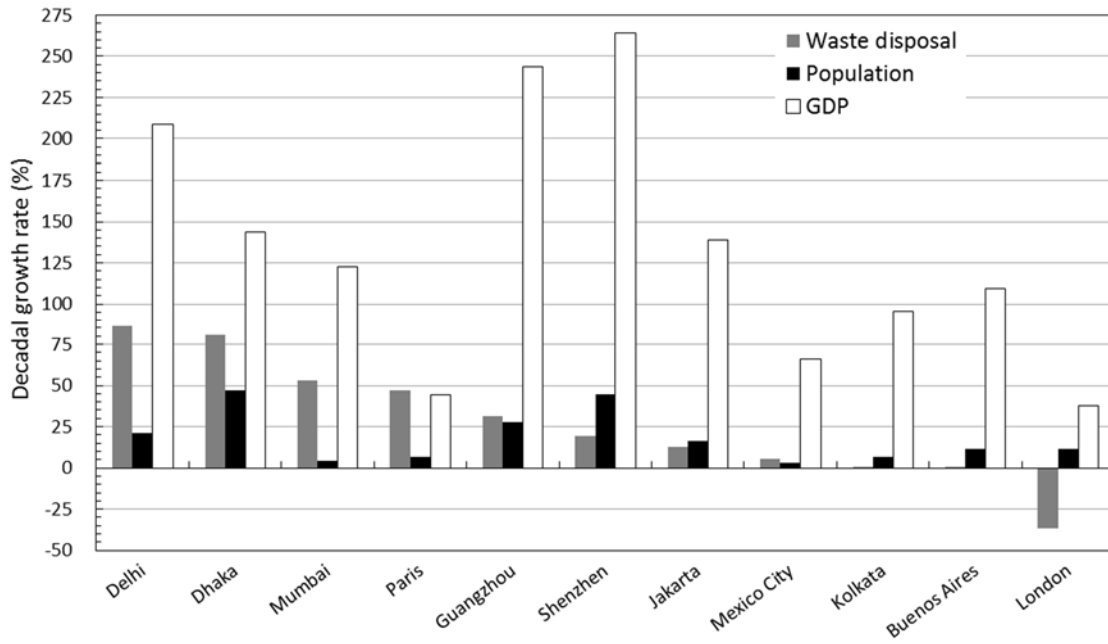

175  
176  
177  
178  
179  
180  
181

182  
183

**Table S1. Initial trial regression models.**

| Variable                                                                                          | t Stat | Coefficient             | 95 % CI                                             |
|---------------------------------------------------------------------------------------------------|--------|-------------------------|-----------------------------------------------------|
| <b>Electricity consumption (R<sup>2</sup> = 0.63; R<sup>2</sup> adjusted = 0.58; n = 27)</b>      |        |                         |                                                     |
| Constant                                                                                          | 1.76   | 0.91                    | -0.16 to 2.0                                        |
| Heating-degree-days                                                                               | 0.85   | 0.0002                  | -0.0004 to 0.0009                                   |
| Area per person                                                                                   | 3.11   | 14337.96                | 4794.93 to 23880.99                                 |
| GDP                                                                                               | 0.34   | 9.1 x 10 <sup>-6</sup>  | 4.70 x 10 <sup>-5</sup> to 6.52 x 10 <sup>-5</sup>  |
| <b>Heating and industrial fuels (R<sup>2</sup> = 0.66; R<sup>2</sup> adjusted = 0.61; n = 27)</b> |        |                         |                                                     |
| Constant                                                                                          | 1.14   | 5.97                    | -4.78 to 16.71                                      |
| Heating-degree-days                                                                               | 5.00   | 0.01                    | 0.009 to 0.02                                       |
| Area per person                                                                                   | 1.05   | 48586                   | -46732 to 143903                                    |
| GDP                                                                                               | -0.40  | -0.0001                 | -0.0007 to 0.0005                                   |
| <b>Ground transportation fuels (R<sup>2</sup> = 0.63; R<sup>2</sup> adjusted = 0.58; n = 27)</b>  |        |                         |                                                     |
| Constant                                                                                          | 0.39   | 1.04                    | -4.51 to 6.58                                       |
| Heating degree days                                                                               | 1.45   | 0.002                   | -0.001 to 0.005                                     |
| Area per person                                                                                   | 2.44   | 57930                   | 8730 to 107130                                      |
| GDP                                                                                               | 0.69   | 9.69 x 10 <sup>-5</sup> | -0.0002 to 0.0004                                   |
| <b>Water consumption (R<sup>2</sup> = 0.58; R<sup>2</sup> adjusted = 0.50; n = 27)</b>            |        |                         |                                                     |
| Constant                                                                                          | -0.83  | -56.58                  | -197.72 to 84.56                                    |
| GDP                                                                                               | -0.81  | -0.002                  | -0.005 to 0.002                                     |
| Precipitation                                                                                     | 0.68   | 0.02                    | -0.04 to 0.08                                       |
| CDD                                                                                               | 0.57   | 0.04                    | -0.09 to 0.17                                       |
| Area per person                                                                                   | 4.23   | 1291425.83              | 658844.63 to 1924007                                |
| <b>Solid waste production (R<sup>2</sup> = 0.60; R<sup>2</sup> adjusted = 0.53; n = 20)</b>       |        |                         |                                                     |
| Constant                                                                                          | 2.89   | 0.20                    | 0.05 to 0.35                                        |
| GDP                                                                                               | 2.78   | 4.27 x 10 <sup>-6</sup> | 1.01 x 10 <sup>-6</sup> to 7.53 x 10 <sup>-6</sup>  |
| 10-yr GDP growth rate (%)                                                                         | 3.91   | 0.001                   | 0.0005 to 0.0017                                    |
| 10-yr pop growth rate (%)                                                                         | -2.45  | -0.006                  | -0.0113 to -0.0008                                  |
| <b>Steel consumption (R<sup>2</sup> = 0.80; R<sup>2</sup> adjusted = 0.60; n = 9)</b>             |        |                         |                                                     |
| Constant                                                                                          | 1.51   | 2169.21                 | -1824 to 6162                                       |
| 10-yr pop growth rate (%)                                                                         | 0.50   | 113                     | -508.46 to 734.47                                   |
| 10-yr pop growth (# people)                                                                       | 0.15   | 0.0003                  | -0.005 to 0.005                                     |
| GDP                                                                                               | -1.53  | -0.09                   | -0.26 to 0.08                                       |
| Area per person                                                                                   | 0.76   | 8841090.86              | -2.33 x 10 <sup>-7</sup> to 4.10 x 10 <sup>-7</sup> |
| <b>Cement consumption (R<sup>2</sup> = 0.57; R<sup>2</sup> adjusted = 0.23; n = 10)</b>           |        |                         |                                                     |
| Constant                                                                                          | 2.78   | 7748.31                 | 596.42 to 14900.2                                   |
| 10-yr pop growth rate (%)                                                                         | -1.19  | -282.39                 | -894.94 to 330.17                                   |
| 10-yr pop growth (# people)                                                                       | 1.08   | 0.003                   | -0.004 to 0.009                                     |
| GDP                                                                                               | 0.50   | 0.09                    | -0.39 to 0.58                                       |
| Area per person                                                                                   | -1.02  | -41288482.93            | -1.45 x 10 <sup>8</sup> to 6.27 x 10 <sup>7</sup>   |

184

185  
186

**Table S2. Access to services in megacities (all values are percentages).**

| <i>Megacity</i> | <i>Households without direct access to water</i> | <i>Households without direct access to drinkable water</i> | <i>Water line losses as a share of total water consumption</i> | <i>Households without sewerage</i> | <i>Wastewater subject to treatment</i> | <i>Households without public waste collection</i> | <i>Households without grid electricity connection</i> |
|-----------------|--------------------------------------------------|------------------------------------------------------------|----------------------------------------------------------------|------------------------------------|----------------------------------------|---------------------------------------------------|-------------------------------------------------------|
| Mumbai          | 21                                               | 21                                                         | 3.7                                                            | 64                                 | 94                                     | 48                                                | 18                                                    |
| Delhi           | 20                                               | 22                                                         | 40                                                             | 64                                 | 56                                     | n.d.                                              | 0.9                                                   |
| Dhaka           | 7                                                | 31                                                         | 33.1                                                           | 65                                 | 65                                     | 10                                                | 67                                                    |
| Kolkata         | n.d.                                             | 39                                                         | 22                                                             | 37                                 | 24                                     | n.d.                                              | 5                                                     |
| Karachi         | 40                                               | 60                                                         | 40                                                             | 43                                 | 22                                     | 40                                                | 35                                                    |
| Jakarta         | 8                                                | 24                                                         | n.d.                                                           | 12                                 | n.d.                                   | n.d.                                              | 0.3                                                   |
| Cairo           | 8                                                | 19                                                         | 6.1                                                            | 23                                 | 6                                      | n.d.                                              | n.d.                                                  |
| Tehran          | 0                                                | 0                                                          | 33.3                                                           | 55                                 | n.d.                                   | 0                                                 | 0.1                                                   |
| Rio de Janeiro  | 1                                                | 11                                                         | 54.2                                                           | 26                                 | 32                                     | 9                                                 | 0                                                     |
| São Paulo       | 2                                                | 2                                                          | 71.4                                                           | 8                                  | 43                                     | 5                                                 | 0                                                     |
| Buenos Aires    | 11                                               | 11                                                         | 76.1                                                           | 14                                 | 42                                     | 5                                                 | 0                                                     |
| Mexico City     | 4                                                | n.d.                                                       | n.d.                                                           | 0.5                                | 15                                     | n.d.                                              | 5                                                     |
| Guangzhou       | 0.3                                              | 2                                                          | n.d.                                                           | 15                                 | 4                                      | 1                                                 | 15                                                    |
| Shenzhen        | 5                                                | 6                                                          | n.d.                                                           | 30                                 | 20                                     | 1                                                 | 15                                                    |
| Shanghai        | 0                                                | 0.6                                                        | 15                                                             | 10                                 | 14                                     | 1                                                 | 0                                                     |
| Beijing         | 0                                                | 0.3                                                        | 15.3                                                           | 5                                  | 5                                      | 0                                                 | 0                                                     |
| <b>Lagos</b>    | n.d.                                             | n.d.                                                       | n.d.                                                           | n.d.                               | n.d.                                   | n.d.                                              | n.d.                                                  |

\* n.d. = no data

187  
188  
189  
190

## 2. Correction for Multiple Inferences

As we established six regression models from a single data set we conducted a second analysis correcting for possible simultaneous statistical inferences. A correlation matrix was calculated for interactions between all variables, and the associated p-values were calculated. The p-values were then corrected for multiple inference using the Benjaminin & Hochberg approach. Results using the final set of variables (as in Table 1) are shown in the supplementary materials. With the Benjaminin & Hochberg correction, all variables in the six regression models are found to be valid, except for the GDP growth variable in the solid waste production model. The correlation matrix also shows significant variables that are dropped in the step-wise regression. In particular, GDP and area per person are significant in most of the models, when the correction is applied. As these two variables are highly correlated ( $\rho=0.8$ ), one of them usually gets eliminated in the step-wise regression. Overall, the regression models shown in Table 1 stand up well to examination for simultaneous inference when using the Benjaminin & Hochberg correction.

| Correlations                   |                   |                        |              |             |             |             |                     |                |       |                       |
|--------------------------------|-------------------|------------------------|--------------|-------------|-------------|-------------|---------------------|----------------|-------|-----------------------|
|                                | Electricity Cons. | Heating & Indust. Fuel | Transp. fuel | Water Cons. | Solid Waste | Steel Cons. | Heating Degree Days | Area per pers. | GDP   | 10-yr GDP growth rate |
| Electricity consumption (MWh)  | -                 |                        |              |             |             |             |                     |                |       |                       |
| Heating & industrial fuel (GJ) | 0.40              | -                      |              |             |             |             |                     |                |       |                       |
| Transportation fuel (GJ)       | 0.61              | 0.70                   | -            |             |             |             |                     |                |       |                       |
| Water consumption (kL)         | 0.51              | 0.51                   | 0.69         | -           |             |             |                     |                |       |                       |
| Solid waste prod (t)           | 0.44              | 0.23                   | 0.57         | 0.45        | -           |             |                     |                |       |                       |
| Steel consumption (Kt)         | -0.28             | 0.03                   | -0.07        | 0.47        | -0.55       | -           |                     |                |       |                       |
| Heating degree days            | 0.45              | 0.59                   | 0.50         | 0.17        | 0.27        | -0.60       | -                   |                |       |                       |
| Area (km2) per person          | 0.78              | 0.60                   | 0.79         | 0.72        | 0.68        | -0.12       | 0.42                | -              |       |                       |
| GDP (\$)                       | 0.68              | 0.41                   | 0.68         | 0.46        | 0.55        | -0.57       | 0.58                | 0.80           | -     |                       |
| 10-yr GDP growth rate          | 0.09              | -0.13                  | -0.18        | 0.12        | 0.37        | 0.43        | 0.15                | -0.02          | -0.21 | -                     |
| 10-yr pop growth (# people)    | -0.08             | 0.07                   | -0.15        | 0.05        | -0.31       | 0.79        | 0.06                | -0.27          | -0.43 | 0.52                  |

| p-values (No correction)       |                   |                        |              |              |              |              |                     |                |              |                       |
|--------------------------------|-------------------|------------------------|--------------|--------------|--------------|--------------|---------------------|----------------|--------------|-----------------------|
|                                | Electricity Cons. | Heating & Indust. Fuel | Transp. fuel | Water Cons.  | Solid Waste  | Steel Cons.  | Heating Degree Days | Area per pers. | GDP          | 10-yr GDP growth rate |
| Electricity consumption (MWh)  | -                 |                        |              |              |              |              |                     |                |              |                       |
| Heating & industrial fuel (GJ) | <b>0.042</b>      | -                      |              |              |              |              |                     |                |              |                       |
| Transportation fuel (GJ)       | <b>0.001</b>      | <b>0.000</b>           | -            |              |              |              |                     |                |              |                       |
| Water consumption (kL)         | <b>0.006</b>      | <b>0.008</b>           | <b>0.000</b> | -            |              |              |                     |                |              |                       |
| Solid waste prod (t)           | <b>0.025</b>      | 0.260                  | <b>0.002</b> | <b>0.020</b> | -            |              |                     |                |              |                       |
| Steel consumption (Kt)         | 0.472             | 0.941                  | 0.854        | 0.205        | 0.125        | -            |                     |                |              |                       |
| Heating degree days            | <b>0.018</b>      | <b>0.002</b>           | <b>0.008</b> | 0.401        | 0.180        | 0.087        | -                   |                |              |                       |
| Area (km2) per person          | <b>0.000</b>      | <b>0.001</b>           | <b>0.000</b> | <b>0.000</b> | <b>0.000</b> | 0.755        | <b>0.028</b>        | -              |              |                       |
| GDP (\$)                       | <b>0.000</b>      | <b>0.037</b>           | <b>0.000</b> | <b>0.015</b> | <b>0.004</b> | 0.106        | <b>0.001</b>        | <b>0.000</b>   | -            |                       |
| 10-yr GDP growth rate          | 0.711             | 0.572                  | 0.427        | 0.616        | 0.097        | 0.247        | 0.518               | 0.928          | 0.364        | -                     |
| 10-yr pop growth (# people)    | 0.706             | 0.767                  | 0.500        | 0.836        | 0.148        | <b>0.011</b> | 0.800               | 0.207          | <b>0.041</b> | <b>0.015</b>          |

| <b>p-values (Benjamini &amp; Hochberg Correction)</b> |                   |                        |              |              |              |              |                     |                |       |                       |
|-------------------------------------------------------|-------------------|------------------------|--------------|--------------|--------------|--------------|---------------------|----------------|-------|-----------------------|
|                                                       | Electricity Cons. | Heating & Indust. Fuel | Transp. fuel | Water Cons.  | Solid Waste  | Steel Cons.  | Heating Degree Days | Area per pers. | GDP   | 10-yr GDP growth rate |
| Electricity consumption (MWh)                         | -                 |                        |              |              |              |              |                     |                |       |                       |
| Heating & industrial fuel (GJ)                        | 0.083             | -                      |              |              |              |              |                     |                |       |                       |
| Transportation fuel (GJ)                              | <b>0.004</b>      | <b>0.001</b>           | -            |              |              |              |                     |                |       |                       |
| Water consumption (kL)                                | <b>0.021</b>      | <b>0.024</b>           | <b>0.001</b> | -            |              |              |                     |                |       |                       |
| Solid waste prod (t)                                  | 0.058             | 0.376                  | <b>0.010</b> | <b>0.048</b> | -            |              |                     |                |       |                       |
| Steel consumption (Kt)                                | 0.619             | 0.941                  | 0.886        | 0.316        | 0.214        | -            |                     |                |       |                       |
| Heating degree days                                   | <b>0.046</b>      | <b>0.006</b>           | <b>0.024</b> | 0.552        | 0.291        | 0.165        | -                   |                |       |                       |
| Area (km2) per person                                 | <b>0.000</b>      | <b>0.006</b>           | <b>0.000</b> | <b>0.000</b> | <b>0.001</b> | 0.844        | 0.062               | -              |       |                       |
| GDP (\$)                                              | <b>0.001</b>      | 0.078                  | <b>0.001</b> | <b>0.040</b> | <b>0.013</b> | 0.189        | <b>0.006</b>        | <b>0.000</b>   | -     |                       |
| 10-yr GDP growth rate                                 | 0.814             | 0.700                  | 0.573        | 0.737        | 0.179        | 0.368        | 0.647               | 0.941          | 0.513 | -                     |
| 10-yr pop growth (# people)                           | 0.814             | 0.844                  | 0.640        | 0.885        | 0.247        | <b>0.031</b> | 0.862               | 0.316          | 0.083 | <b>0.040</b>          |

212  
213  
214  
215

### 216 **3. Definition and Notes on Megacities**

217  
218 \* Brinkoff's populations for 2010 are given in parentheses.

219 \*\*GDP values are in PPP adjusted US dollars for 2011

#### 220 221 **London**

- 222
- 223 - Study area population: 8,173,941 (Megacity: 12,400,000)
- 224 - Per capita GDP: 47,333
- 225 - Constituent cities: Camden, Greenwich, Hackney, Hammersmith and Fulham
- 226 Islington, Royal Borough of Kensington and Chelsea, Lambeth, Lewisham,
- 227 Southwark, Tower Hamlets, Wandsworth, Westminster, Barking and Dagenham,
- 228 Barnet, Bexley, Brent, Bromley, Croydon, Ealing, Enfield, Haringey, Harrow,
- 229 Havering, Hillingdon, Hounslow, Kingston upon Thames, Merton, Newham,
- 230 Redbridge, Richmond upon Thames, Sutton, Waltham Forest, City of London
- 231
- 232

#### 233 **Paris**

- 234
- 235 - Study area population: 11,852,851 (Megacity:10,400,000)
- 236 - Per capita GDP: 56,943
- 237 - Constituent cities: Paris, Seine-et-Marne, Yvelines, Essonne, Hauts-de-Seine,
- 238 Seine-Saint-Denis, Val-de-Marne, Val-d'Oise
- 239 - Mobile energy consumption values for 2006 were substituted for 2011.
- 240

#### 241 **Moscow**

- 242
- 243 - Study area population: 11,503,501 (Megacity: 13,600,000)
- 244 - Per capita GDP: 57,758
- 245 - Constituent cities: Central Borough, Northern Borough, North-Eastern Borough,
- 246 Eastern Borough, South-Eastern Borough, Southern Borough, South-Western
- 247 Borough, Western Borough, North-Western Borough, Zelenograd Borough
- 248 - Solid waste generation for 2011 is estimated to be 400 kg per person per year, 13
- 249 percent of which is incinerated and the remainder sent to landfill (*Future Watch*
- 250 *Report*, 2013).
- 251 - Heating and industrial fuel consumption data were scaled by population from
- 252 national to megacity level (values represent heating component of combined heat
- 253 and power system)
- 254

#### 255 **New York City**

- 256
- 257 - Study area population: 22,214,518 (Megacity: 22,200,000)
- 258 - Per capita GDP: 60,751
- 259 - Constituent cities: New York City (Bronx, Brooklyn, Manhattan, Queens and
- 260 Staten Island); West Connecticut (Fairfield, Litchfield and New Haven counties);
- 261 North New Jersey (Bergen, Essex, Hudson, Hunterdon, Mercer, Middlesex,



262 Monmouth, Morris, Ocean, Passaic, Somerset, Sussex, Union and Warren  
263 counties), Long Island (Nassau and Suffolk counties); Mid-Hudson region  
264 (Dutchess, Orange, Putnam, Rockland, Sullivan, Ulster and Westchester counties)  
265 - Energy consumption data were scaled by population (from 20,314,077 people to  
266 22,214,518 people)  
267 - New Jersey energy consumption data for 2006 were used in the total energy  
268 consumption calculation for New York Metropolitan region for 2011  
269

## 270 **Los Angeles**

271  
272 - Study area population: 9,889,000 (Megacity: 17,900,000)  
273 - Per capita GDP: 74,045  
274 - Constituent cities: Los Angeles, Pasadena, Santa Monica, Monrovia, Pomona,  
275 Long Beach, South Pasadena, Compton, Redondo Beach, Whittier, Azusa,  
276 Covina, Alhambra, Arcadia, Vernon, Glendale, Huntington Park, La Verne,  
277 Hermosa Beach, Sierra Madre, Claremont, Inglewood, Burbank, San Fernando,  
278 Glendora, El Monte, Manhattan Beach, San Gabriel, San Marino, Avalon,  
279 Beverly Hills, Monterey Park, El Segundo, Culver City, Montebello, Torrance,  
280 Lynwood, Hawthorne, South Gate, West Covina, Signal Hill, Maywood, Bell,  
281 Gardena, Palos Verdes Estates, Lakewood, Baldwin Park, Cerritos, La Puente,  
282 Downey, Rolling Hills, Paramount, Santa Fe Springs, Industry, Bradbury,  
283 Irwindale, Duarte, Norwalk, Bellflower, Rolling Hills Estates, Pico Rivera, South  
284 El Monte, Walnut, Artesia, Rosemead, Lawndale, Commerce, La Mirada, Temple  
285 City, San Dimas, Cudahy, Bell Gardens, Hidden Hills, Palmdale, Hawaiian  
286 Gardens, Lomita, Carson, Rancho Palos Verdes, La Cañada-Flintridge, Lancaster,  
287 La Habra Heights, Westlake Village, Agoura Hills, West Hollywood, Santa  
288 Clarita, Diamond Bar, Malibu, Calabasas  
289 - Stationary energy consumption data (excluding electricity) were scaled by  
290 population from state (California) to megacity level  
291 - Mobile energy consumption data for diesel and jet fuel were scaled by population  
292 from state (California) to megacity level  
293

## 294 **Mexico City**

295  
296 - Study area population: 8,851,080 (Megacity: 23,400,000)  
297 - Per capita GDP: 34,973  
298 - Constituent cities: Azcapotzalco, Coyoacán, Cuajimalpa de Morelos, Gustavo A.  
299 Madero, Iztacalco, Iztapalapa, La Magdalena Contreras, Milpa Alta, Álvaro  
300 Obregón, Tláhuac, Tlalpan, Xochimilco, Benito Juárez, Cuauhtémoc, Miguel  
301 Hidalgo, Venustiano Carranza, Tizayuca, Acolman, Amecameca, Apaxco,  
302 Atenco, Atizapán de Zaragoza, Atlautla, Axapusco, Ayapango, Coacalco de  
303 Berriozábal, Cocotitlán, Coyotepec, Cuautitlán, Chalco, Chiautla, Chicoloapan,  
304 Chiconcuac, Chimalhuacán, Ecatepec de Morelos, Ecatzingo, Huehuetoca,  
305 Hueypoxtla, Huixquilucan, Isidro Fabela, Ixtapaluca, Jaltenco, Jilotzingo,  
306 Juchitepec, Melchor Ocampo, Naucalpan de Juárez, Nezahualcóyotl, Nextlalpan,  
307 Nicolás Romero, Nopaltepec, Otumba, Ozumba, Papalotla, La Paz, San Martín de

308 las Pirámides, Tecamac, Temamatla, Temascalapa, Teotihuacán, Tepetlaoxtoc,  
309 Tepetlixpa, Tepetzotlán, Tequixquiac, Texcoco, Tezoyuca, Tlalmanalco,  
310 Tlalnepantla de Baz, Tultepec, Tultitlán, Villa del Carbón, Zumpango, Cuautitlán  
311 Izcalli, Valle de Chalco, Solidaridad, Tonanitla  
312 - Stationary energy consumption data (excluding electricity) were scaled by  
313 population from national to megacity level  
314 - Jet fuel data were scaled by population from national to megacity level  
315

### 316 **Lagos**

317  
318 - Study area population: 20,546,999 (Megacity: 11,800,000)  
319 - Per capita GDP: 6,834  
320 - Constituent cities: Agege, Ajeromi-ifelodun, Alimosho, Amuwo Odofin, Apapa  
321 Badagry, Epe, Eti-osa  
322 - Stationary energy (excluding electricity) and mobile energy consumption data  
323 were scaled by population from national to megacity level  
324

### 325 **Sao Paulo**

326  
327 - Study area population: 19,822,559 (Megacity: 20,900,000)  
328 - Per capita GDP: 20,916  
329 - Constituent cities: Arujá, Barueri, Biritiba Mirim, Caieiras, Cajamar,  
330 Carapicuíba, Cotia, Diadema, Embu das Artes, Embu-Guaçu, Ferraz de  
331 Vasconcelos, Francisco Morato, Franco da Rocha, Guararema, Guarulhos,  
332 Itapevi, Itapeçerica da Serra, Itaquaquecetuba, Jandira, Juquitiba, Mairiporã,  
333 Mauá, Mogi das Cruzes, Osasco, Pirapora do Bom Jesus, Poá, Ribeirão Pires, Rio  
334 Grande da Serra, Salesópolis, Santa Isabel, Santana de Parnaíba, Santo André,  
335 São Bernardo do Campo, São Caetano do Sul, São Lourenço da Serra, São Paulo,  
336 Suzano, Taboão da Serra, Vargem Grande Paulista

337

### 338 **Rio de Janeiro**

339  
340 - Study area population: 11,909,897 (Megacity: 12,600,000)  
341 - Per capita GDP: 13,653  
342 - Constituent cities: Belford Roxo, Duque de Caxias, Guapimirim, Itaboraí,  
343 Itaguaí, Japeri, Magé, Maricá, Mesquita, Nilópolis, Niterói, Nova Iguaçu,  
344 Paracambi, Queimados, Rio de Janeiro, São Gonçalo, São João de Meriti,  
345 Seropédica e Tanguá  
346

### 347 **Buenos Aires**

348  
349 - Study area population: 12,806,866 (Megacity: 13,300,000)  
350 - Per capita GDP: 8,503  
351 - Constituent cities: Almirante Brown, Avellaneda, Berazategui, Esteban  
352 Echeverría, Ezeiza, Florencio Varela, General San Martín, Hurlingham, Ituzaingó,  
353 José C. Paz, La Matanza, Lanús, Lomas de Zamora, Malvinas Argentinas, Merlo,

354 Moreno, Morón, Quilmes, San Fernando, San Isidro, San Miguel, Tigre, Tres de  
355 Febrero, Vicente López

356

357 **Cairo**

358

359 - Study area population: 20,495,461 (Megacity: 15,200,000)

360 - Per capita GDP: 6,440

361 - Constituent cities: Cairo Governorate, the urban parts of Giza Governorate, and  
362 Qaliubia Governorate

363 - Wastewater volumes for 2006 and 2011 include sewerage and industrial waste.

364 - Electricity consumption data were scaled by number of customers from national  
365 to megacity level

366

367 **Tehran**

368

369 - Study area population: 12,183,391 (Megacity: 12,800,000)

370 - Per capita GDP: 11,860

371 - Constituent cities: Boomehen, Pardis, Firuzkooh, Varamin, Shahriar, Islamshahr,  
372 Robotkarim, Damavand, Pakdasht, Karaj, Nesa, and Savejbolagh

373 - Water consumption values are based on an estimated consumption rate of 250  
374 litres per day

375 - Electricity line losses are estimated to be 15 % of electricity consumption values

376 - Water line losses are estimated to be 25 % of water consumption values

377

378 **Istanbul**

379

380 - Study area population: 13,483,052 (Megacity: 12,800,000)

381 - Per capita GDP: 10,444

382 - Constituent cities: Adalar, Arnavutköy, Ataşehir, Avcılar, Bakırköy, Beylikdüzü,  
383 Beykoz, Beşiktaş, Beyoğlu, B.Evler, B.Paşa, Başakşehir, Bağcılar, B.Çekmece,  
384 Çatalca, Çekmeköy, Esenyurt, Eyüp, Esenler, Fatih, G.O.Paşa, Güngören,  
385 Kadıköy, Kartal, K.Çekmece, Kağıthane, Maltepe, Pendik, Sancaktepe, Sarıyer,  
386 Sultangazi, Sultanbeyli, Şişli, Şile, Silivri, Tuzla, Ümraniye, Üsküdar,  
387 Zeytinburnu

388

389 **Manila**

390

391 - Study area population: 11,855,975 (Megacity: 19,600,000)

392 - Per capita GDP: 11,788

393 - Constituent cities: Caloocan, Malabon, Navotas, Valenzuela, Quezon City,  
394 Marikina, Pasig, Taguig, Makati, Manila, Mandaluyong, San Juan, Pasay,  
395 Parañaque, Las Piñas, Muntinlupa

396 - Mobile energy consumption data were scaled by population from national to  
397 megacity level

398

399 **Jakarta**

- 400  
401 - Study area population: 9,786,372 (Megacity: 15,400,000)  
402 - Per capita GDP: 10,040  
403 - Constituent cities: Central Jakarta (Jakarta Pusat), North Jakarta (Jakarta Utara),  
404 East Jakarta (Jakarta Timur), South Jakarta (Jakarta Selatan), West Jakarta  
405 (Jakarta Barat), Thousand Islands (Kepulauan Seribu)  
406 - When converting solid waste units from volume to mass, one cubic metre of  
407 waste is assumed to be equivalent to 600 kg  
408 - Fuel oil consumption values for 2006 were substituted for 2011  
409 - Mobile energy consumption values (excluding gasoline and diesel) for 2006 were  
410 substituted for 2011

411

#### 412 **Delhi**

413

- 414 - Study area population: 16,753,235 (Megacity: 23,200,000)  
415 - Per capita GDP: 8,443  
416 - Constituent cities: Municipal Corporation of Delhi, New Delhi Municipal  
417 Corporation, Delhi Cantonment Board  
418 - It is estimated that line losses for water are 40 % of water consumption values  
419

#### 420 **Mumbai**

421

- 422 - Study area population: 12,478,447 (Megacity: 22,800,000)  
423 - Per capita GDP: 8,971  
424 - Constituent cities: Greater Mumbai, Navi Mumbai, Thane, Kalyan-Dombivali,  
425 Vasai-Virar, Mira-Bhayandar, Bhiwandi-Nizampur, Ulhasnagar  
426 - Electricity line losses are estimated to be 15 % of electricity consumption values  
427 - Water line losses are estimated to be 20 % of water consumption values (Reddy,  
428 2013)  
429

#### 430 **Kolkata**

431

- 432 - Study area population: 14,112,536 (Megacity: 16,300,000)  
433 - Per capita GDP: 5,765  
434 - Constituent cities: Kolkata Municipal Corporation, Howrah Municipal  
435 Corporation, Chandan nagar Municipal Corporation  
436 - GDP values for 2011 were scaled by the national cumulative GDP growth rate  
437 (2000 to 2009)  
438 - Water consumption values include private water tapping (which has no proper  
439 accounting) and are therefore said to be unreliable  
440

#### 441 **Karachi**

442

- 443 - Study area population: 15,500,000 (Megacity: 16,200,000)  
444 - Per capita GDP: 5,161

- 445 - Constituent cities: Bin Qaism, Gadap, Malir, Gulberg, Liaquatabad, North  
446 Karachi, North Nazimabad, Jamsheed, Lyari, Saddar, Baldia, Kemari, Orangi, Site,  
447 Gulshan, Korangi, Landhi, Shah Faisal  
448 - Stationary energy (excluding electricity) and mobile energy consumption data  
449 were scaled by population from national to megacity level  
450

#### 451 **Dhaka**

- 452  
453 - Study area population: 15,616,562 (Megacity: 13,600,000)  
454 - Per capita GDP: 6,139  
455 - Constituent cities: Dhaka City Corporation (North), Dhaka City Corporation  
456 (South), Narayangonj, Savar, Gazipur, Tongi  
457 - Stationary energy consumption data (excluding electricity) were scaled by GDP  
458 from national to megacity level  
459 - Mobile energy consumption data were scaled by population from national to  
460 megacity level  
461 - Building materials data were scaled by population from national to megacity level  
462

#### 463 **Seoul**

- 464  
465 - Study area population: 10,528,774 (Megacity: 24,200,000)  
466 - Per capita GDP: 32,261  
467 - Constituent cities: Dobong, Dongdaemun, Dongjak, Eunpyeong, Gangbuk,  
468 Gangdong, Gangnam, Gangseo, Geumcheon, Guro, Gwanak, Gwangjin, Jongno,  
469 Jung, Jungnang, Mapo, Nowon, Seocho, Seodaemun, Seongbuk, Seongdong,  
470 Songpa, Yangcheon, Yeongdeungpo, Yongsan  
471

#### 472 **Tokyo**

- 473  
474 - Study area population: 35,622,000 (Megacity: 34,000,000)  
475 - Per capita GDP: 33,521  
476 - Constituent cities: Tokyo, Kanagawa, Chiba and Saitama prefectures  
477 - Water consumption data were scaled by population from metropolitan to megacity  
478 level  
479 - Solid waste data were scaled by population from metropolitan to megacity level  
480

#### 481 **Osaka**

- 482  
483 - Study area population: 17,089,000 (Megacity: 16,800,000)  
484 - Per capita GDP: 30,124  
485 - Constituent cities: Osaka, Kyoto, and Hyogo prefectures  
486 - Water consumption data were scaled by population from metropolitan to megacity  
487 level  
488 - Solid waste data were scaled by population from metropolitan to megacity level  
489 - Solid waste disposal on land includes residue from incineration.  
490

491 **Shenzhen**

492

- 493 - Study area population: 10,467,400 (Megacity: 10,400,000)
- 494 - Per capita GDP: 26,171
- 495 - Constituent cities: Futian, Luohu, Nanshan, Yantian, Baoan, and Longgang
- 496 districts
- 497 - Heating and industrial fuels, and ground transportation fuels use scaled from
- 498 provincial values. Mobile energy data for jet fuel include marine fuel

499

500 **Guangzhou**

501

- 502 - Study area population: 12,751,400 (Megacity: 16,500,000)
- 503 - Per capita GDP: 23,197
- 504 - Constituent cities: Yuexiu Area, Haizhu Area, Liwan Area, Tianhe Area, Baiyun
- 505 Area, Huangpu Area, Huadu Area, Panyu Area, Luogang Area, Nansha Area,
- 506 Conghua City, Zengcheng City
- 507 - All diesel oil is assumed to be used for transportation, although it is possible that
- 508 some diesel is used for stationary energy

509

510 **Shanghai**

511

- 512 - Study area population: 23,474,600 (Megacity 18,400,000)
- 513 - Per capita GDP: 19,470
- 514 - Constituent cities: Pudong New District, Xuhui District, Changning District,
- 515 Putuo District, Zhabei District, Hongkou District, Yangpu District, Huangpu
- 516 District, Luwan District, Jingan District, Baoshan District, Minhang District,
- 517 Jiading District, Jinshan District, Songjiang District, Qingpu District, Nanhui
- 518 District, Fengxian District, Chongming County
- 519 - All diesel oil is assumed to be used for transportation, although it is possible that
- 520 some diesel is used for stationary energy
- 521 - Mobile energy data for gasoline and diesel include jet and marine fuel

522

523 **Beijing**

524

- 525 - Study area population: 20,186,000 (Megacity: 13,600,000)
- 526 - Per capita GDP: 19,169
- 527 - Constituent cities: Dongcheng District, Xicheng District, Chaoyang District,
- 528 Haidian District, Fengtai District, Shijingshan District, Mentougou District,
- 529 Fangshan District, Daxing District, Tongzhou District, Shunyi District,
- 530 Changping District, Pinggu District, Huairou District, Miyun County, Yanqing
- 531 County
- 532 - All diesel oil is assumed to be used for transportation, although it is possible that
- 533 some diesel is used for stationary energy
- 534 - Mobile energy data for gasoline and diesel include jet fuel

535

536  
537  
538  
539  
540  
541  
542

#### **4. References**

1. Kennedy CA, Ibrahim N, Stewart I, Facchini A, Mele R (2014) Developing a multi-layered indicator set for urban metabolism studies in megacities, *Ecological Indicators*, 47, 7-15.
2. City Population, <http://www.citypopulation.de/world/Agglomerations.html>, accessed April 1, 2013
